# Supplementary material for: Silicon-doped graphene edges: an efficient metal-free catalyst for the reduction of CO2 into methanol and ethanol
Source: Royal Society of Chemistry journal article supplement (doi:10.1039/c9cy01709g), 2019-01-01
Supplement: c9cy01709g1.pdf [file c9cy01709g1.pdf]

## Supporting information for:

# Silicon-Doped Graphene Edge: An Efficient Metal Free Catalyst for the Reduction of CO<sub>2</sub> into Methanol and Ethanol

Xin Mao<sup>1</sup>, Gurpreet Kour<sup>1</sup>, Lei Zhang<sup>1</sup>, Tianwei He<sup>1</sup>, Sufan Wang<sup>2</sup>, Cheng Yan<sup>1</sup>, Zhonghua Zhu<sup>3</sup> and Aijun Du<sup>1\*</sup>

<sup>1</sup>*School of Chemistry, Physics and Mechanical Engineering, Science and Engineering Faculty, Queensland University of Technology, Gardens Point Campus, Brisbane, QLD 4001, Australia*

<sup>2</sup>*College of Chemistry and Materials Science, Anhui Normal University, Wuhu 241000, China*

<sup>3</sup>*School of Chemical Engineering, The University of Queensland, Brisbane 4072, Australia*

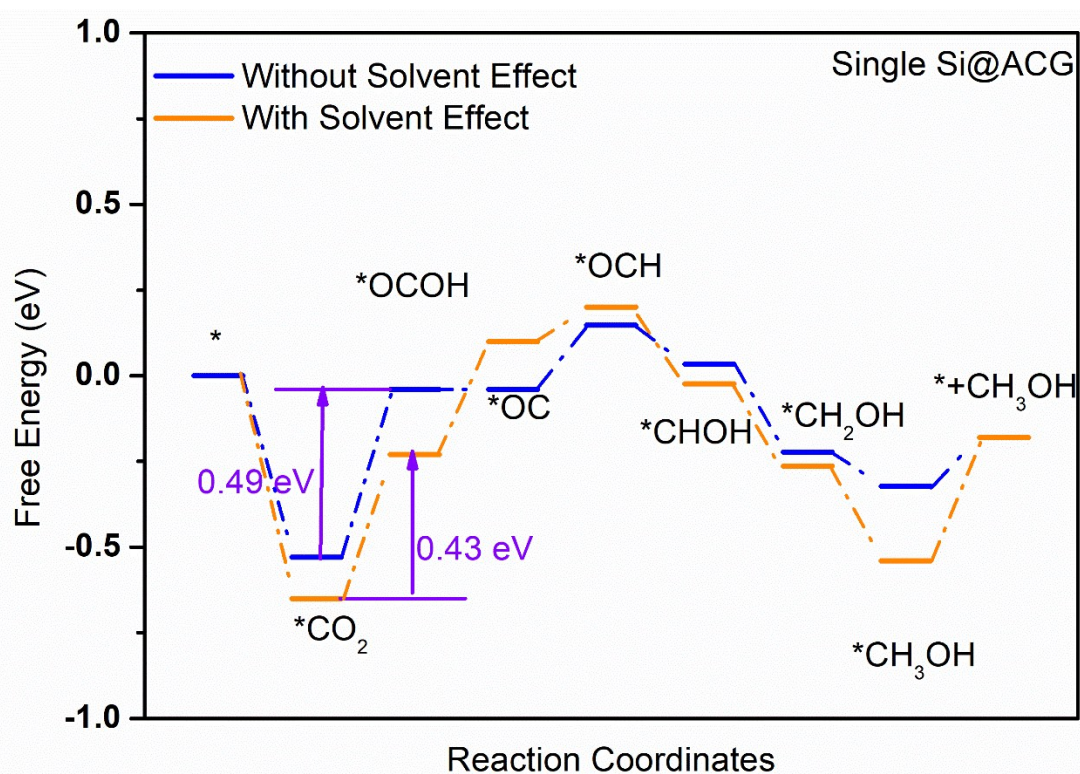

Figure S1. The Gibbs free energy changes for Si@ACG with and without solvent effect.

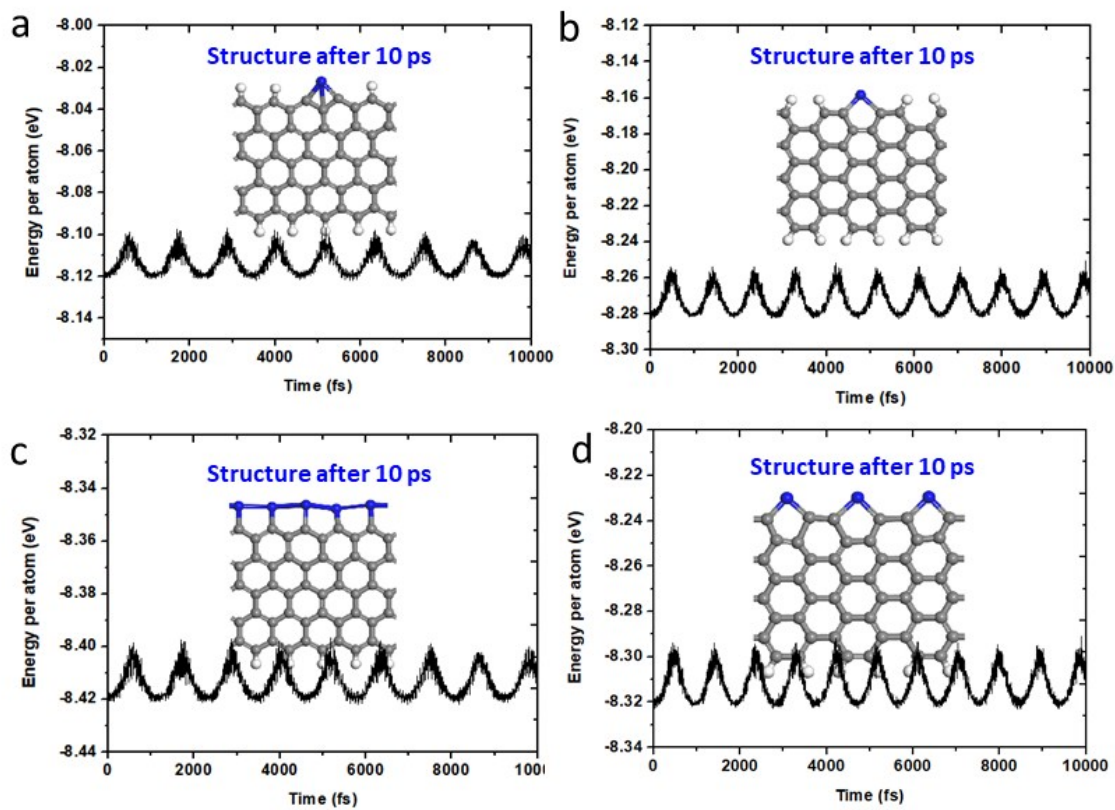

Figure S2. Variations of energy per atom against the time for AIMD simulations for (a) Si@ZZG, (b) Si@ACG, (c) Si chain @ZZG, and (d) Si chain @ACG, insert are the snapshot of the atomic configurations. The simulation is run under 300 K for 10ps with a time step of 1fs.

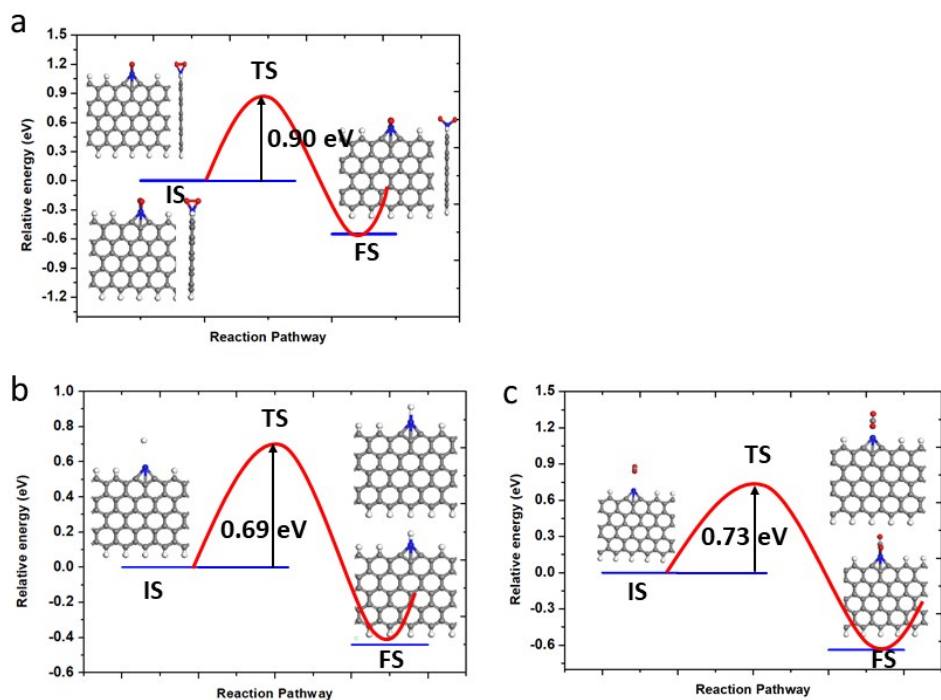

Figure S3. Energy profile for (a) oxidation process of Si @ZZG, (b) adsorption process of H atom, and (c) adsorption process of CO<sub>2</sub> molecule.

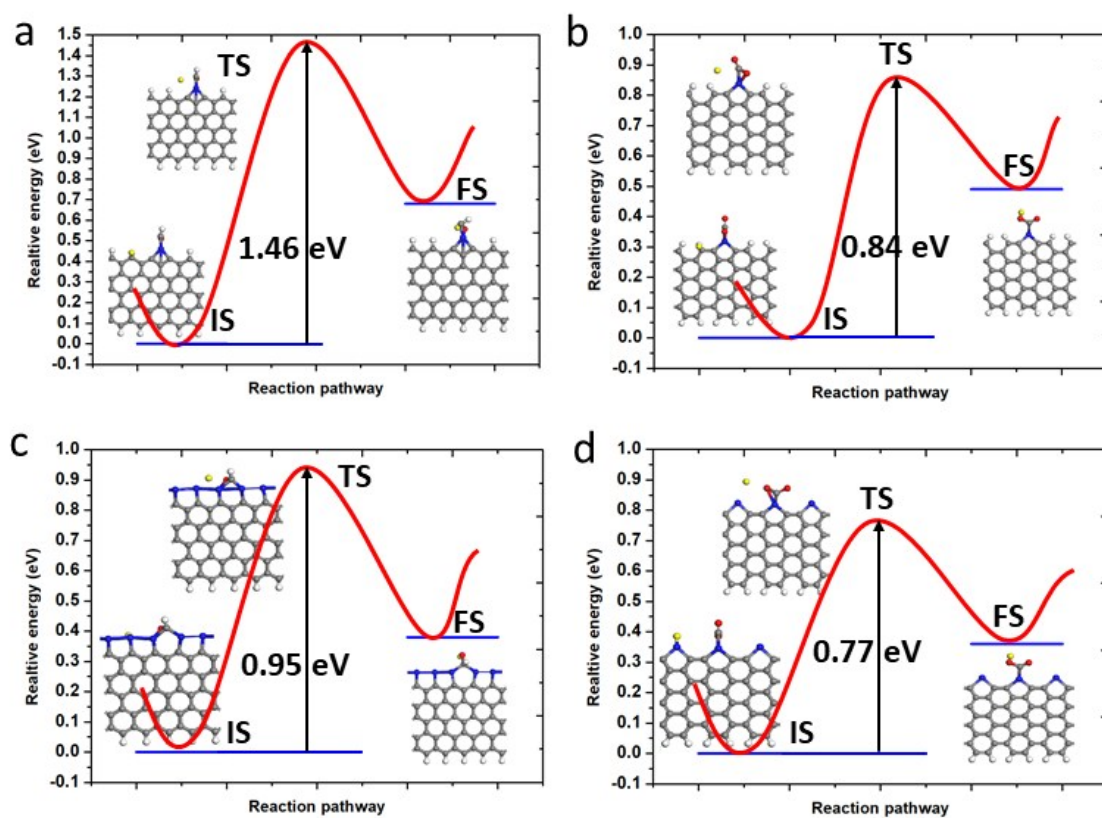

Figure S4. The calculated NEB processes for the formation of CH<sub>3</sub>OH on (a) Si @ZZG (PDS: \*OCH + \*H → \*CHOH), (b) Si @ACG (PDS: \*COO + \*H → \*COOH), (c) Si chain @ZZG

(PDS:  $*\text{OCH} + *H \rightarrow *CHOH$ ), (d) Si chain @ACG (PDS:  $*\text{COO} + *H \rightarrow *COOH$ ). Insert are the optimised structures for initial structure (IS), transition state (TS), and final structure (FS).

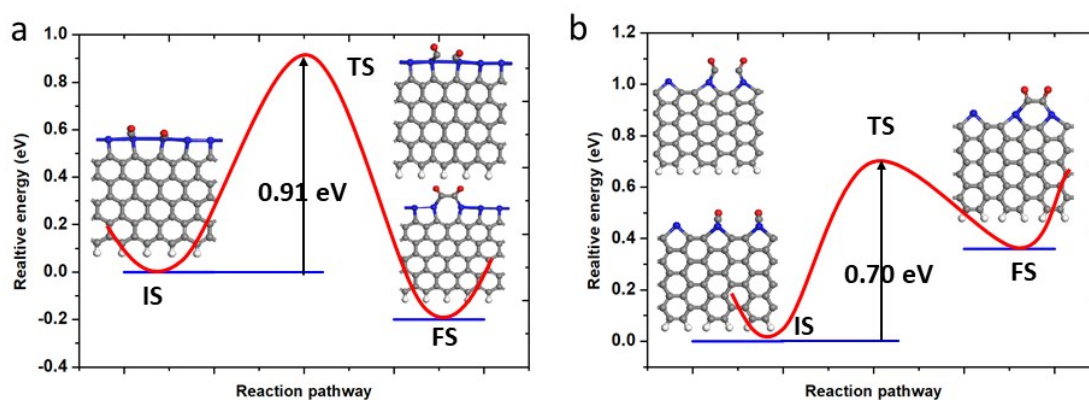

Figure S5. The calculated NEB process for C-C coupling process on (a) Si chain @ZZG, and (b) Si chain @ACG.

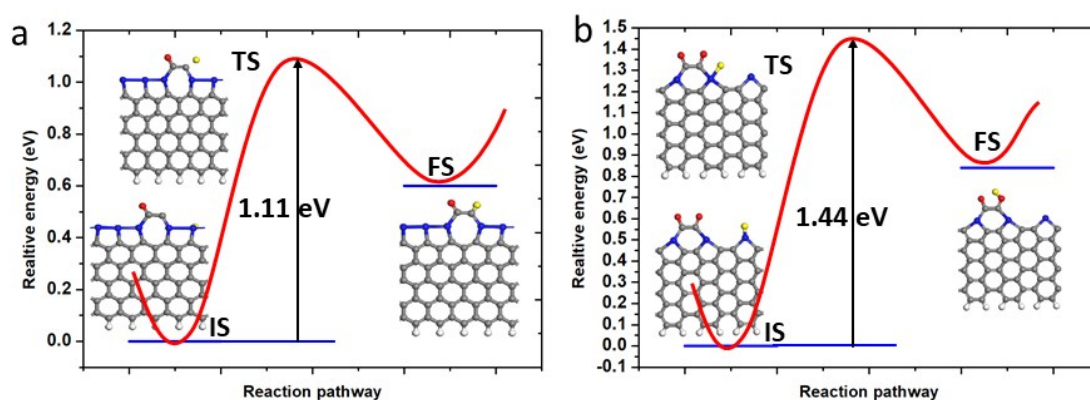

Figure S6. The calculated energy profiles for the formation of  $\text{CH}_3\text{CH}_2\text{OH}$  on (a) Si chain @ZZG (PDS:  $*\text{CCO} + *H \rightarrow *CHCO$ ), (b) Si chain @ACG (PDS:  $*\text{COCO} + *H \rightarrow *COCO H$ ). Insert are the optimised structures for initial structure (IS), transition state (TS), and final structure (FS).

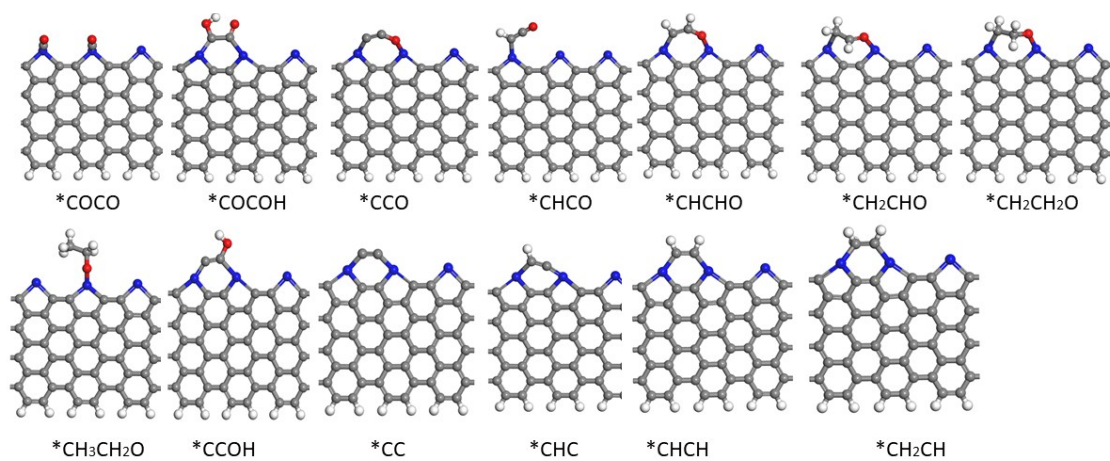

Figure S7. The optimized structures for the intermediates of the  $\text{CH}_3\text{CH}_2\text{OH}$  and  $\text{C}_2\text{H}_4$  formation processes on armchair edge.
